# Supplementary material
Source: Springer Nature journal article supplement (https://www.springermedizin.de/resource/supplementary/12877_2010_294_MOESM2_ESM.pdf/9439420)
Supplement: MOESM2 [file 9439420]

|                                                                | <u>resident level</u> |                  |                     |                  | <u>staff level</u> |                    |
|----------------------------------------------------------------|-----------------------|------------------|---------------------|------------------|--------------------|--------------------|
|                                                                | MMSE <sup>1</sup>     | AES <sup>1</sup> | NPI-NH <sup>1</sup> | SRS <sup>2</sup> | NHP <sup>2</sup>   | PASTA <sup>2</sup> |
| T <sub>0</sub> : baseline                                      | ■                     | ■                | ■                   | ■                | ■                  | ■                  |
| T <sub>1</sub> : 3 months after beginning of the intervention  |                       | ■                | ■                   |                  |                    |                    |
| T <sub>2</sub> : 6 months after beginning of the intervention  |                       | ■                | ■                   | ■                | ■                  | ■                  |
| T <sub>3</sub> : 12 months after beginning of the intervention | ■                     | ■                | ■                   | ■                | ■                  | ■                  |

<sup>1</sup> Observer-related measures; <sup>2</sup> Self-report measures
